# Supplementary material
Source: Royal Society of Chemistry journal article supplement (doi:10.1039/d5fo03328d)
Supplement: d5fo03328d1.pdf [file d5fo03328d1.pdf]

**Dietary N-acylethanolamines are bioaccessible in the small intestine and modulate postprandial hormonal responses: a randomized crossover trial in subjects with ileostomy**

Silvia Tagliamonte

**Supplementary material**

**Supplementary Table 1:** Concentrations of Linoleylethanolamide (LEA), Palmitoylethanolamide (PEA), Oleoylethanolamide (OEA), N-acylethanolamines and N-acylphosphatidylethanolamines in each food item provided at breakfast.

| <b>HNM</b>                        | <b>LEA (µg)</b> | <b>OEA (µg)</b> | <b>PEA (µg)</b> | <b>NAEs (µg)</b> | <b>NAPEs (mg)</b> |
|-----------------------------------|-----------------|-----------------|-----------------|------------------|-------------------|
| <b>White bread (46 g)</b>         | 24.1            | 1.4             | 2.1             | 27.6             | 20.2              |
| <b>Milk (150 mL)</b>              | 0.1             | 0.3             | 0.6             | 0.9              | 0.2               |
| <b>Jam (10 g)</b>                 | 0.1             | 0.1             | 0.9             | 1.1              | /                 |
| <b>Cocoa powder (15 g)</b>        | 12.1            | 41.4            | 1.9             | 55.4             | 12.0              |
| <b>Whole-grain cereals (30 g)</b> | 33.5            | 3.9             | 1.6             | 39.0             | 25.4              |
| <b>LNM</b>                        |                 |                 |                 |                  |                   |
| <b>Whole-grain bread (80 g)</b>   | 4.0             | 0.5             | 0.9             | 5.4              | 11.3              |
| <b>Milk (150 mL)</b>              | 0.1             | 0.3             | 0.6             | 0.9              | 0.2               |
| <b>Butter (5 g)</b>               | 0.5             | 0.6             | 0.1             | 1.1              | 0.02              |
| <b>Instant coffee (2g)</b>        | 0.1             | /               | /               | 0.1              | 0.0012            |
| <b>Jam (10 g)</b>                 | 0.1             | 0.1             | 0.9             | 1.1              | /                 |
| <b>Dried apples (30 g)</b>        | 1.1             | 0.1             | 0.2             | 1.4              | 0.6               |

**Supplementary Table 2:** List of food items provided during the buffet meal.

| <b>Food Item</b>      | <b>Quantity (g)</b> |
|-----------------------|---------------------|
| Cooked Sliced Chicken | 200                 |
| Philadelphia          | 110                 |
| Tuna                  | 112                 |
| Peperami              | 45                  |
| Crackers              | 48                  |
| Crisps                | 50                  |
| Salad                 | 180                 |
| White Bread           | 200                 |
| Hummus                | 200                 |
| Yogurt                | 240                 |
| Digestive Biscuits    | 100                 |
| Banana                | n=2                 |
| Apple                 | n=2                 |
| Butter                | 30                  |
| Mayonnaise            | 27                  |

**Supplementary Table 3:** Acquisition parameters used for the LC-MS/MS analysis.

|                            | Precursor ion [M+H] <sup>+</sup><br>m/z | Precursor ion<br>[M+H] <sup>+</sup> m/z | DP <sup>g</sup> | CE <sup>h</sup> |
|----------------------------|-----------------------------------------|-----------------------------------------|-----------------|-----------------|
| <b>AEA</b> <sup>a</sup>    | 348.0                                   | 62                                      | 35              | 35              |
| <b>OEA</b> <sup>b</sup>    | 326.0                                   | 62                                      | 60              | 35              |
| <b>LEA</b> <sup>c</sup>    | 324.0                                   | 62                                      | 60              | 30              |
| <b>PEA</b> <sup>d</sup>    | 300.0                                   | 62                                      | 60              | 30              |
| <b>2-AG</b> <sup>e</sup>   | 379.4                                   | 287.3                                   | 38              | 15              |
|                            |                                         | 203.5                                   |                 | 25              |
| <b>AEA-d8</b> <sup>f</sup> | 356.5                                   | 63.2                                    | 50              | 31              |
|                            |                                         | 209.3                                   |                 | 18              |

<sup>a</sup> AEA, Arachidonylethanolamide;

<sup>b</sup> OEA, Oleoylethanolamide;

<sup>c</sup> LEA, Linolethanolamide;

<sup>d</sup> PEA, Palmitoylethanolamide;

<sup>e</sup> 2-AG, 2-Arachidonoylglycerol;

<sup>f</sup> AEA-d8, Arachidonylethanolamide d8;

<sup>g</sup> CE, Collision energy;

<sup>h</sup> DP, Declustering potential.

**Supplementary Table 4:** Psychometric characteristics of ileostomy participants (n=14).

---

|                                           |            |
|-------------------------------------------|------------|
| <b>QUALITY OF LIFE-PCS</b>                | 57.7 ± 0.5 |
| <b>QUALITY OF LIFE-MCS</b>                | 43.1 ± 4.5 |
| <b>TFEQ RESTRAINT</b>                     | 6.3 ± 1.2  |
| <b>TFEQ DISINHIBITION</b>                 | 4.7 ± 1.4  |
| <b>TFEQ HUNGER</b>                        | 5.9 ± 1.3  |
| <b>Depression</b>                         |            |
| Normal/mild, n (%)                        | 12 (85.7)  |
| Moderate/severe/extremely severe, n (%)   | 2 (14.3)   |
| <b>Anxiety</b>                            |            |
| Normal/mild, n (%)                        | 10 (71.4)  |
| Moderate/severe/extremely severe, n (%)   | 4 (28.6)   |
| <b>Stress</b>                             |            |
| Normal/mild, n (%)                        | 12 (85.7)  |
| Moderate/severe/ extremely severe, n (%)  | 2 (14.3)   |
| <b>SHPS</b>                               |            |
| Normal hedonic tone, n (%)                | 13 (92.8)  |
| Abnormal hedonic tone, n (%)              | 1 (7.1)    |
| <b>Power of food scale-Food available</b> | 12.1 ± 5.8 |
| <b>Power of food scale-Food present</b>   | 10.6 ± 4.9 |
| <b>Power of food scale-Food tasted</b>    | 11.6 ± 3.6 |

---

Data are expressed as means ± SEM.

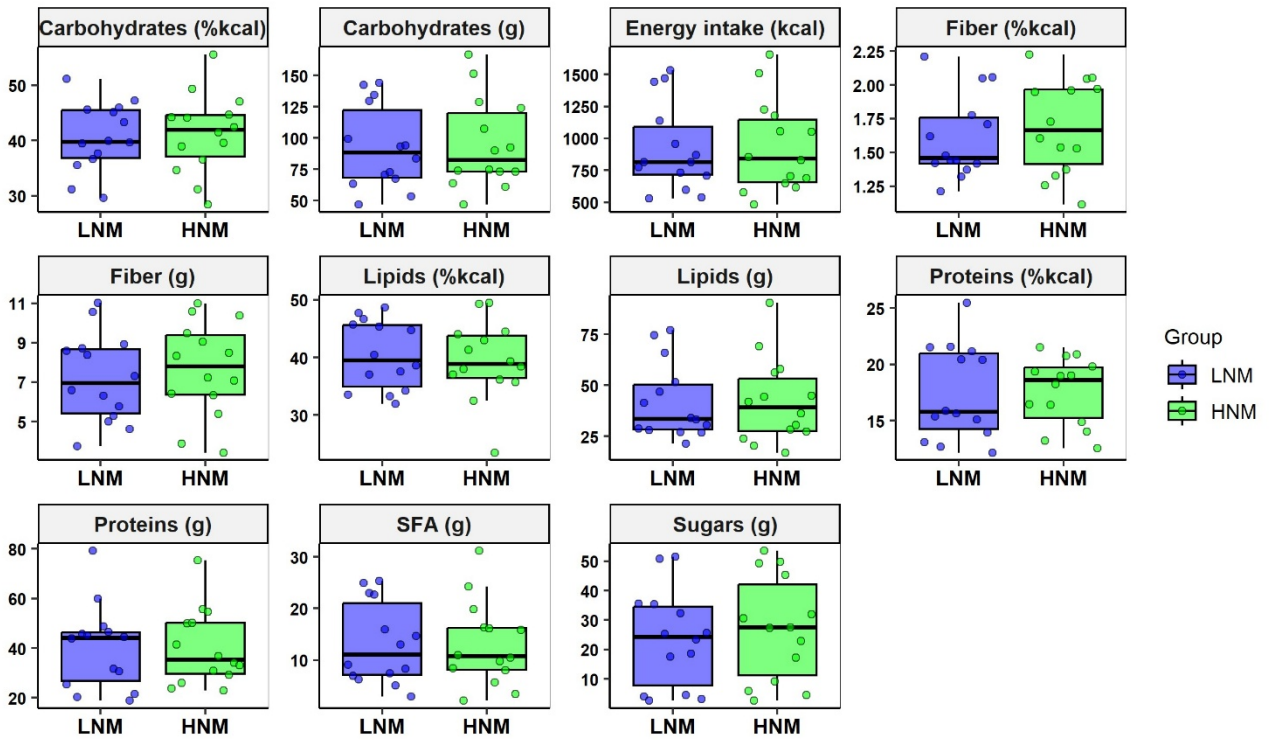

**Supplementary Fig. 1:** Energy intake and nutrition composition resulting from the buffet meal test 8h post-consumption of HNM (High-NAEs meal, in green) and LNM (Low-NAEs meal, in blue). SFA, Saturated fatty acids.
